# Supplementary material for: The Synergistic Beneficial Effects of Ginkgo Flavonoid andCoriolus versicolorPolysaccharide for Memory Improvements in a Mouse Model of Dementia
Source: Hindawi journal article supplement (doi:10.1155/2015/128394), 2015-01-01
Supplement: f1 [file 128394.f1.pdf]

Supplementary table. 95% confidence interval

| group            | figure 1A        |                  |                  | figure 1B        |                    |
|------------------|------------------|------------------|------------------|------------------|--------------------|
|                  | D1               | D2               | D3               | percent time     | passing times      |
| Control          | -                | -                | -                | -                | -                  |
| Model vs Control | -29.93 to -2.156 | -44.37 to -16.39 | -40.21 to -18.57 | 18.24 to 31.63   | 1.778 to 3.722     |
| Galanthamine     | 6.221 to 36.43   | 5.250 to 36.36   | 8.166 to 34.20   | -25.92 to -10.88 | -3.360 to -1.640   |
| CVP              | 5.782 to 32.34   | 3.604 to 34.07   | 6.279 to 33.34   | -26.47 to -13.34 | -1.535 to 0.03499  |
| GF               | 5.605 to 31.89   | 4.297 to 35.39   | 9.147 to 34.41   | -26.08 to -11.65 | -2.949 to -0.5509  |
| CVP & GF         | 7.916 to 33.09   | 6.772 to 38.86   | 9.303 to 34.63   | -26.97 to -14.44 | -3.450 to -0.7998  |
| CVP & GF vs CVP  | -11.58 to 14.47  | -10.71 to 18.67  | -12.23 to 16.55  | -7.372 to 5.770  | -2.716 to -0.03438 |
| CVP & GF vs GF   | -11.13 to 14.64  | -12.04 to 17.99  | -13.36 to 13.74  | -9.060 to 5.375  | -1.993 to 1.243    |

95% confidence interval

| group            | figure 2A          |                  | figure 2B         |  |
|------------------|--------------------|------------------|-------------------|--|
|                  | the right entries  | latency          | error numbers     |  |
| Control          | -                  | -                | -                 |  |
| Model vs Control | 2.407 to 4.993     | 29.49 to 145.0   | -4.154 to -2.096  |  |
| Galanthamine     | -4.495 to -1.105   | -104.0 to 4.454  | 2.017 to 3.983    |  |
| CVP              | -3.344 to -0.2561  | -76.84 to 3.585  | 1.187 to 3.313    |  |
| GF               | -3.968 to -0.03158 | -84.27 to -8.228 | 1.476 to 3.524    |  |
| CVP & GF         | -4.125 to -1.075   | -129.4 to -38.63 | 1.327 to 3.673    |  |
| CVP & GF vs CVP  | -2.318 to 0.7183   | -86.34 to -8.408 | -0.7735 to 1.274  |  |
| CVP & GF vs GF   | -2.548 to 1.348    | -74.45 to -1.045 | -0.9825 to 0.9825 |  |
